# Supplementary material
Source: HighWire-hosted journal article supplement (https://jmg.bmj.com/content/57/6/389)

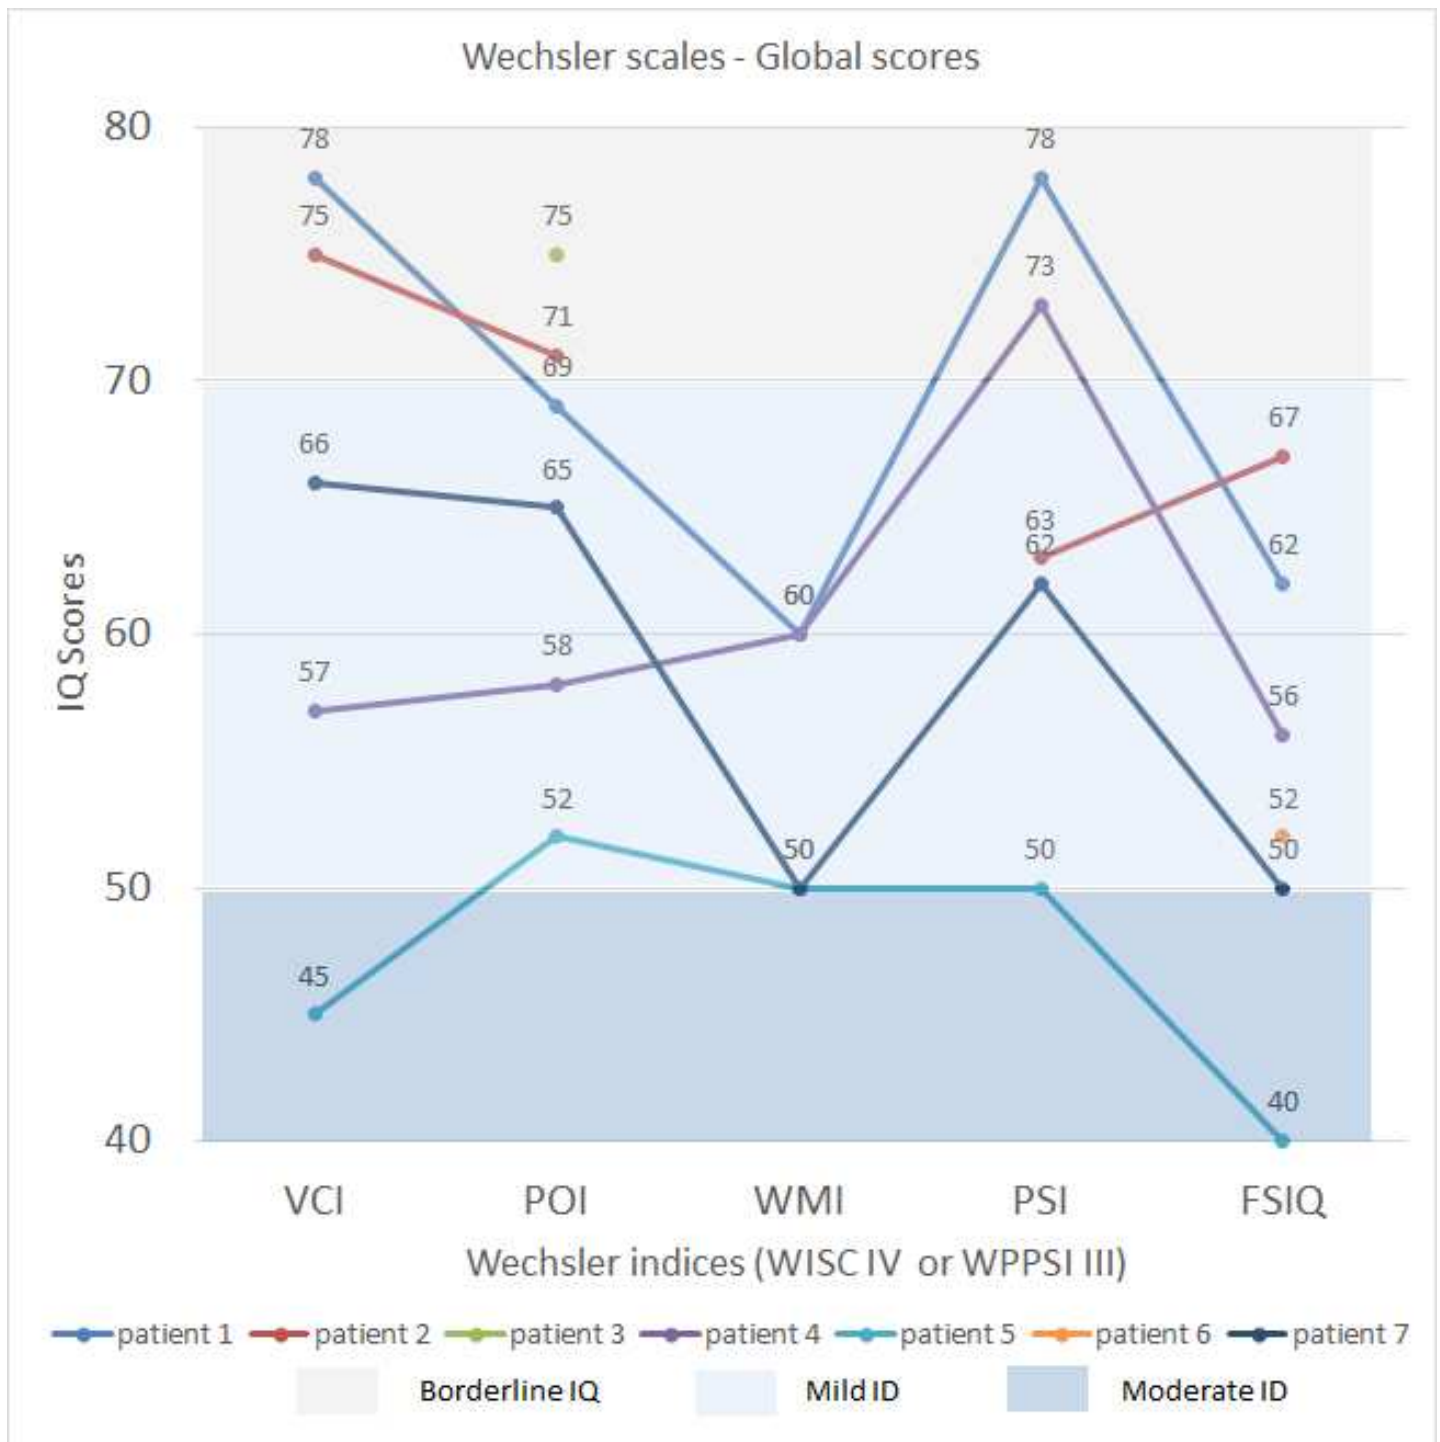

Supplementary Figure 3

Supplement: inline-supplementary-material-4 [file inline-supplementary-material-4.pdf]
